# Supplementary material for: In-Depth Analysis of Physiologically Based Pharmacokinetic (PBPK) Modeling Utilization in Different Application Fields Using Text Mining Tools
Source: MDPI journal article supplement (doi:10.3390/pharmaceutics15010107), 2022-12-28
Supplement: s1 [file s1]

## Electronic Supplementary Material

### Supplement S1: Summary of statistically significant words for each topic extracted with bag of words and word enrichment widgets

**Table S1.** Statistically significant words for each topic.

|         | Word          | p-value               |
|---------|---------------|-----------------------|
| Topic 1 | Rat           | $1.7 \times 10^{-55}$ |
|         | Human         | $2.7 \times 10^{-47}$ |
|         | Health        | $4.7 \times 10^{-43}$ |
|         | Exposure      | $5.3 \times 10^{-36}$ |
|         | Risk          | $6.7 \times 10^{-36}$ |
|         | Blood         | $3.0 \times 10^{-32}$ |
|         | Specie        | $2.8 \times 10^{-22}$ |
|         | Tissue        | $9.6 \times 10^{-18}$ |
|         | Liver         | $2.2 \times 10^{-16}$ |
|         | Toxicity      | $7.4 \times 10^{-14}$ |
|         | Extrapolation | $1.8 \times 10^{-3}$  |
|         | Distribution  | $2.5 \times 10^{-3}$  |
| Topic 2 | Plasma        | $5.0 \times 10^{-42}$ |
|         | Patient       | $5.6 \times 10^{-41}$ |
|         | Treatment     | $5.7 \times 10^{-38}$ |
|         | Dosing        | $4.0 \times 10^{-29}$ |
|         | Renal         | $2.5 \times 10^{-16}$ |
|         | Efficacy      | $3.2 \times 10^{-12}$ |
|         | Therapeutic   | $4.7 \times 10^{-12}$ |
|         | Intravenous   | $9.2 \times 10^{-11}$ |
|         | Healthy       | $1.5 \times 10^{-9}$  |
|         | Clinical      | $8.0 \times 10^{-8}$  |
|         | Disease       | $2.0 \times 10^{-6}$  |
|         | Population    | $3.1 \times 10^{-6}$  |
| Topic 3 | Child         | $1.3 \times 10^{-30}$ |
|         | Age           | $2.9 \times 10^{-29}$ |
|         | Population    | $4.2 \times 10^{-24}$ |
|         | Adult         | $8.3 \times 10^{-22}$ |
|         | Dosing        | $7.4 \times 10^{-9}$  |
|         | Protein       | $1.9 \times 10^{-7}$  |
|         | Patient       | $1.2 \times 10^{-5}$  |
|         | Enzyme        | $8.2 \times 10^{-5}$  |
|         | Clearance     | $1.5 \times 10^{-4}$  |
|         | Clinical      | $1.4 \times 10^{-3}$  |
|         | Healthy       | $2.5 \times 10^{-3}$  |
|         | Disease       | $4.9 \times 10^{-3}$  |
| Topic 4 | Interaction   | $5.0 \times 10^{-9}$  |
|         | DDI           | $9.7 \times 10^{-8}$  |
|         | P450          | $4.2 \times 10^{-6}$  |
|         | Cyp3a4        | $9.0 \times 10^{-6}$  |

|         |                  |                       |
|---------|------------------|-----------------------|
|         | Cytochrome       | $2.5 \times 10^{-5}$  |
|         | Inhibitor        | $3.4 \times 10^{-5}$  |
|         | Midazolam        | $3.1 \times 10^{-4}$  |
|         | Rifampicin       | $4.3 \times 10^{-4}$  |
|         | Induction        | $2.1 \times 10^{-3}$  |
|         | Weak             | $2.1 \times 10^{-3}$  |
|         | Moderate         | $2.7 \times 10^{-3}$  |
|         | Potent           | $9.5 \times 10^{-3}$  |
| Topic 5 | Formulation      | $5.4 \times 10^{-5}$  |
|         | Silico           | $1.0 \times 10^{-4}$  |
|         | Dissolution      | $2.5 \times 10^{-4}$  |
|         | Absorption       | $5.5 \times 10^{-4}$  |
|         | Release          | $3.9 \times 10^{-3}$  |
|         | Biopharmaceutics | $8.6 \times 10^{-3}$  |
|         | Permeability     | $1.47 \times 10^{-2}$ |
|         | Biorelevant      | $1.7 \times 10^{-2}$  |
|         | Food             | $3.2 \times 10^{-2}$  |
|         | Gastrointestinal | $4.2 \times 10^{-2}$  |
|         | Testing          | $4.5 \times 10^{-2}$  |
|         | Bioavailability  | $4.7 \times 10^{-2}$  |
